# Supplementary material
Source: Springer Nature journal article supplement (https://www.springermedizin.de/resource/supplementary/13075_2013_4012_MOESM4_ESM.pdf/9695836)

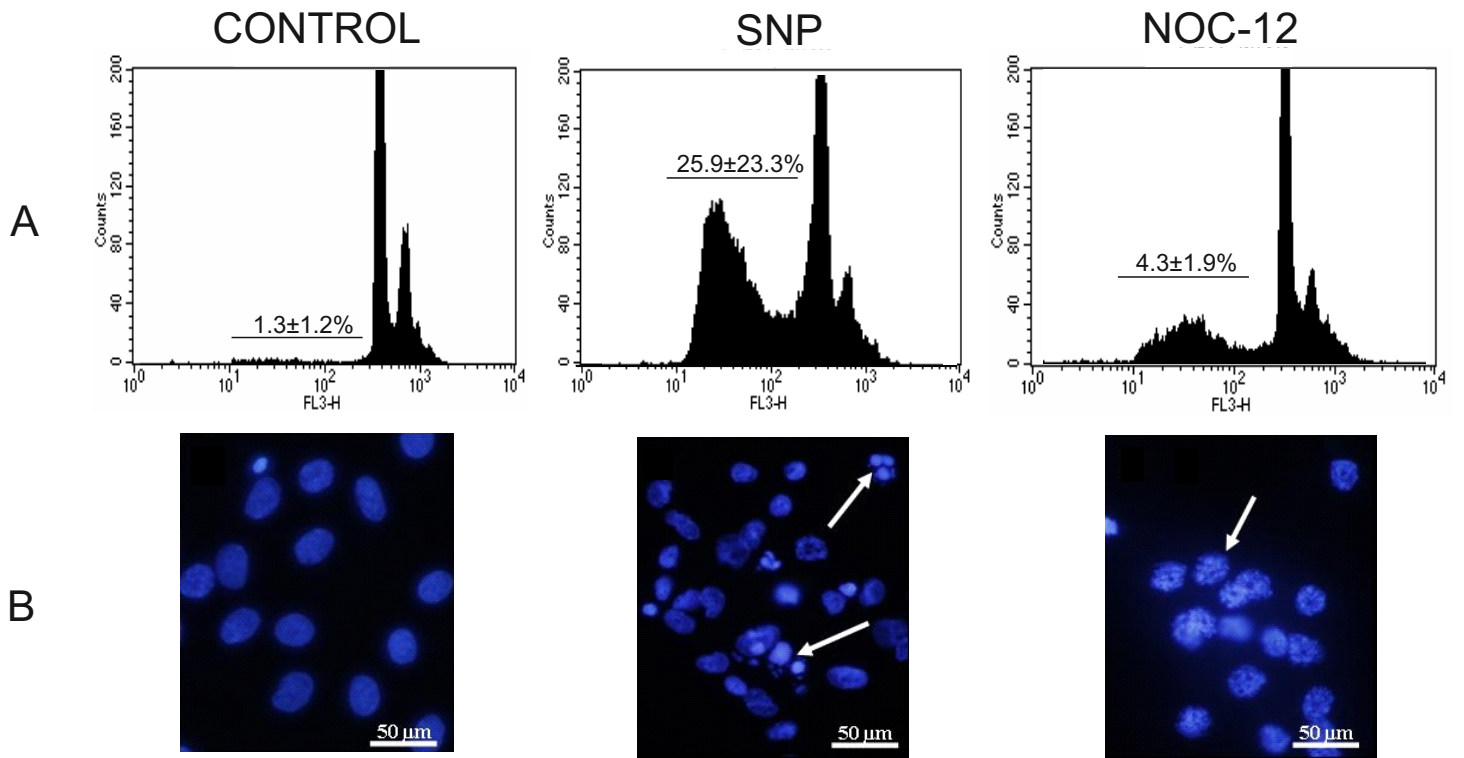

Supplement: MOESM4 [file 9695836]
